## 1 Abstract

2 Swarmer cells of the gram-negative uropathogenic bacteria *Proteus mirabilis* and *Vibrio*  
3 *parahaemolyticus* become long (>10-100  $\mu\text{m}$ ) and multinucleate during their growth and  
4 motility on polymer surfaces. We demonstrate increasing cell length is accompanied by  
5 a large increase in flexibility. Using a microfluidic assay to measure single-cell  
6 mechanics, we identified large differences in swarmer cell stiffness of (bending rigidity  
7 of *P. mirabilis*,  $9.6 \times 10^{-22} \text{ N m}^2$ ; *V. parahaemolyticus*,  $9.7 \times 10^{-23} \text{ N m}^2$ ) compared to  
8 vegetative cells ( $1.4 \times 10^{-20} \text{ N m}^2$  and  $3.2 \times 10^{-22} \text{ N m}^2$ , respectively). The reduction in  
9 bending rigidity (~3-24 fold) was accompanied by a decrease in the average  
10 polysaccharide strand length of the peptidoglycan layer of the cell wall from 28-30 to  
11 19-22 disaccharides. Atomic force microscopy revealed a reduction in *P. mirabilis*  
12 peptidoglycan thickness from 1.5 nm (vegetative) to 1.0 nm (swarmer) and electron  
13 cryotomography indicated changes in swarmer cell wall morphology. *P. mirabilis* and *V.*  
14 *parahaemolyticus* swarmer cells became increasingly sensitive to osmotic pressure and  
15 susceptible to cell wall-modifying antibiotics (compared to vegetative cells)—they were  
16 ~30% more likely to die after 3 h of treatment with minimum inhibitory concentrations  
17 of the  $\beta$ -lactams cephalexin and penicillin G. The adaptive cost of swarming is offset by  
18 the increase in cell susceptibility to physical and chemical changes in their environment,  
19 thereby suggesting the development of new chemotherapies for bacteria that leverage  
20 swarming for the colonization of hosts and survival.

## 1 **Importance**

2 *Proteus mirabilis* and *Vibrio parahaemolyticus* are bacteria that infect humans. To adapt to  
3 environmental changes, these bacteria alter their cell morphology and move collectively  
4 to access new sources of nutrients in a process referred to as ‘swarming’. We found that  
5 a change in the composition and thickness of the peptidoglycan layer of the cell wall  
6 makes swarmer cells of *P. mirabilis* and *V. parahaemolyticus* more flexible (i.e., reduced  
7 cell stiffness) and increases their sensitivity to osmotic pressure and cell-wall targeting  
8 antibiotics (e.g.,  $\beta$ -lactams). These results highlight the importance of assessing the  
9 extracellular environment in determining antibiotic doses and the use of  $\beta$ -lactams  
10 antibiotics for treating infections caused by swarmer cells of *P. mirabilis* and *V.*  
11 *parahaemolyticus*.

12

13

14

15

16

17

18

19

20

## 1 Introduction

2 Bacteria have evolved a variety of mechanisms to adapt to their physical environment.  
3 For example, in response to fluctuating environmental conditions, changes in  
4 biochemistry and gene regulation can alter bacterial shape and increase cell fitness. Cell  
5 filamentation is a commonly observed change in bacterial cell shape (1, 2) and has been  
6 described as a mechanism that enables bacteria to evade predation by the innate  
7 immune system during host infections (1).

8 In close proximity to surfaces, many bacteria alter their morphology and leverage  
9 cell-cell physical contact to move collectively to access new sources of nutrients and  
10 growth factors (3, 4). Referred to as ‘swarming’, this process is common among motile  
11 bacteria and has been connected to bacterial pathogenesis and infections (3, 4). Swarmer  
12 cells of *Salmonella enterica*, *Pseudomonas aeruginosa*, *Serratia marcescens*, and *Bacillus*  
13 *subtilis* have reduced antibiotic susceptibility—compared to vegetative cells—to a  
14 variety of drugs that alter protein translation, DNA transcription, and the bacterial cell  
15 membrane and cell wall (5-8). The specific biochemical and biophysical mechanisms  
16 underlying these observations are unknown.

17 Here, we describe physical changes in swarmer cells of the gram-negative  
18 pathogenic bacteria *Proteus mirabilis* and *Vibrio parahaemolyticus* that have the opposite  
19 effect: they increase the susceptibility of cells to cell wall-targeting clinical antibiotics.  
20 We found that large changes in the length of *P. mirabilis* and *V. parahaemolyticus*



1 swarmer cells are accompanied by an increase in flexibility (i.e., a reduction in cell  
2 stiffness) that enables long cells to pack together tightly and form cell-cell interactions;  
3 maximizing cell-cell interactions promotes surface motility (9). Using biophysical,  
4 biochemical, and structural techniques, we quantified changes in the structure and  
5 composition of the *P. mirabilis* and *V. parahaemolyticus* cell wall in swarmer and  
6 vegetative cells and characterized their susceptibility to osmotic changes and cell wall-  
7 modifying antibiotics. Our results indicate that morphological changes that enable these  
8 bacteria to adapt to new physical environments come at a significant fitness cost, as cells  
9 become more susceptible to their chemical environment. In particular, changes in the  
10 composition and thickness of *P. mirabilis* and *V. parahaemolyticus* swarmer cells make  
11 them more sensitive to osmotic changes and to cell-wall modifying antibiotics, thereby  
12 suggesting that these classes of drugs may be useful in treating infections of these  
13 bacteria (e.g., in urinary tract infections).

14

15

16

17

18

19

20

## 1 Results

### 2 **The bending rigidity of *P. mirabilis* and *V. parahaemolyticus* cells decreases during**

3 **swarming.** During surface motility, *P. mirabilis* and *V. parahaemolyticus* cells grow into

4 swarmers that are characteristically long (10-100  $\mu\text{m}$ ) and present a high surface density

5 of flagella that enables them to translate through viscous environments (3, 10). We

6 found that these swarmer cells display an unusual phenotype that is rarely observed

7 among gram-negative bacteria: remarkable flexibility and a shape that is dynamically

8 altered by adjacent cell motion and collisions (Fig. 1). The ability of *P. mirabilis* swarmer

9 cells to maximize cell-cell contacts plays a role in their cooperative motility (10); our

10 observations indicate that flexibility enables these long cells to optimize packing into

11 multicellular structures that move cooperatively across surfaces.

12 Bacterial cell mechanics is generally attributed to the peptidoglycan (PG) layer of

13 the cell wall, which has a thickness of  $\sim 3\text{-}50$  nm and surrounds the cytoplasmic

14 membrane (11). Very little is known about mechanical regulation in bacteria (12-17) and

15 we are unaware of studies connecting swarming to changes in cell mechanics. We

16 quantified changes in swarmer-cell stiffness using cell-bending assays in a reloadable,

17 poly(dimethylsiloxane) microfluidic system (Fig. 2 and S1) that is related to a method

18 developed previously (18). In bending assays, we applied a shear fluid force to multiple

19 filamentous cells, resulting in horizontal deflection of their cell tips (Fig. 2); fitting the

20 deflection data to a mechanical model provided us with a value of the (flexural)

1 bending rigidity of cells (Fig. S2). After a thorough comparison of several models of  
2 variable complexity, we found our results to provide a reasonable semi-quantitative  
3 estimate of bending rigidity. Introducing a reloadable mechanism enabled us to  
4 perform rapid bending measurements of *P. mirabilis* and *V. parahaemolyticus* swarmer  
5 cells after isolating them from swarm plates. Once removed from a surface, *P. mirabilis*  
6 and *V. parahaemolyticus* swarmer cells dedifferentiate, grow, and divide to form  
7 vegetative cells with a wild type length, requiring us to rapidly perform assays with  
8 swarmer cells after their isolation from surfaces. As a point of comparison, we  
9 filamented vegetative cells of *P. mirabilis* and *V. parahaemolyticus* using aztreonam—an  
10 inhibitor of the division specific transpeptidase PBP3—to match the length of swarmer  
11 cells ( $22.2 \pm 12.5 \mu\text{m}$  and  $12.4 \pm 8.2 \mu\text{m}$  respectively) and compared their bending rigidity  
12 values to swarmer cells. As a control, we measured the bending rigidity of cells of  
13 *Escherichia coli* strain MG1655 that we filamented using aztreonam, and determined the  
14 value to be  $3.7 \times 10^{-20} \text{ N m}^2$  (Fig. 3); using a value for the thickness of the PG of 4-nm (19)  
15 yields a Young's modulus of 23 MPa, which is close to values that have been reported  
16 previously and supports the choice of using aztreonam to filament cells, as it apparently  
17 has no effect on the bending rigidity of cells (12, 18). We assume that the effect of  
18 aztreonam on *P. mirabilis* and *V. parahaemolyticus* cells is similar to that which we  
19 measured for *E. coli*. We found a substantial decrease in the bending rigidity of swarmer  
20 cells of both *P. mirabilis* (~23-fold) and *V. parahaemolyticus* (2.4-fold) compared to

1 vegetative cells (Fig. 3), which is consistent with our observations of the flexibility of  
2 swarming cells by microscopy. *V. parahaemolyticus* vegetative cells were remarkably  
3 flexible: ~154-fold more than *E. coli* cells and ~58-fold more than *P. mirabilis* swarmer  
4 cells (Fig. 3).

5 To confirm that using aztreonam to inhibit PBP3 and produce filamentous cells  
6 does not change the cross-linking density of PG at the division plane and alter cell  
7 mechanics, we compared bending rigidity values of cells treated with aztreonam and  
8 cells filamented by overexpressing SulA, a protein that prevents polymerization of the  
9 division protein FtsZ and blocks cell division. Both mechanisms of filamenting *E. coli*  
10 cells produced similar bending rigidity values:  $3.8 \times 10^{-20}$  N m<sup>2</sup> (SulA) and  $3.7 \times 10^{-20}$  N  
11 m<sup>2</sup> (aztreonam) (Fig. S3A).

12 During swarming, *P. mirabilis* and *V. parahaemolyticus* cells dramatically increase  
13 their density of flagella. Since flagella are attached to these cells through a protein  
14 complex that extends through the PG (referred to as the basal body), it is possible that  
15 these structures create local defects in the PG that alter its mechanical properties. To test  
16 whether the density of flagella on swarming cells is responsible for the changes in cell  
17 mechanics that we observe, we performed bending rigidity measurements (Fig. S3B) on  
18 two K-12-derived strains of *E. coli* that have substantially different flagella densities  
19 (Fig. S3C). Our results indicated no appreciable change in stiffness values (bending

1 rigidity of  $3.9 \times 10^{-20}$  N m<sup>2</sup> at high flagella density and  $3.7 \times 10^{-20}$  N m<sup>2</sup> at low flagella  
2 density; Fig. S3B).

3 Overexpressing FlhDC—the heterohexameric activator that is important for  
4 swarming—in vegetative cells growing in liquid produces a phenotype that replicates  
5 many of the characteristics of swarmer cells, including increased cell length and flagella  
6 density (20). A relationship between FlhDC production and cell mechanics is untested.  
7 To test whether FlhDC is connected to changes in swarmer cell stiffness, we  
8 overexpressed the protein from the plasmid-encoded genes *pflhDC* in filamentous cells  
9 of *P. mirabilis* and measured their bending rigidity. We detected a ~1.75-fold difference  
10 in bending rigidity between wildtype ( $1.4 \times 10^{-20}$  N m<sup>2</sup>) and *pflhDC*-containing *P.*  
11 *mirabilis* vegetative cells ( $8.0 \times 10^{-21}$  N m<sup>2</sup>), and a 1.3-fold difference between wildtype  
12 and *pflhDC*-containing *P. mirabilis* swarmer cells ( $8.0 \times 10^{-22}$  N m<sup>2</sup>) (Fig. 3). These results  
13 indicate that FlhDC overexpression during swarming is a minor contributor to the  
14 mechanical phenotype of swarming cells; the majority of the mechanical changes we  
15 observe arise from another regulatory pathway(s).

16

17 ***P. mirabilis* and *V. parahaemolyticus* swarmer cells are more sensitive to osmotic**  
18 **stress than vegetative cells.** To complement cell stiffness measurements, we also  
19 studied changes in the mechanics of swarmer cells and filamented vegetative cells by  
20 measuring their changes in length and width in response to changes in osmotic

1 pressure, which cause cells to shrink (in a NaCl solution) and swell (in H<sub>2</sub>O) (Fig. S4).  
2 We filamented *P. mirabilis*, *V. parahaemolyticus*, and control *E. coli* cells using aztreonam  
3 to create a range of cell lengths that matched the lengths of *P. mirabilis* and *V.*  
4 *parahaemolyticus* swarmer cells. We expected that low values of bending rigidity and  
5 compositional and structural changes in PG would cause swarmer cells to elongate in  
6 response to changes in osmotic pressure (in comparison to filamented, vegetative cells).  
7 We found that *P. mirabilis* and *V. parahaemolyticus* swarmer cell extension in response to  
8 osmotic shock was significantly larger than filamented, vegetative cells (Fig. 4). To  
9 circumvent the cellular production of osmolytes to protect cells from large changes in  
10 osmotic pressure during shock (typically produced within 1 min) (21), we used a  
11 microfluidic device to rapidly switch between H<sub>2</sub>O and a NaCl solution and measured  
12 changes in cell length before cells adapted (Fig. S4).

13 Osmotic shifts produced similar changes in the length (Fig. 4A) and width (Fig.  
14 4B) of vegetative filamented *P. mirabilis* cells compared to *E. coli* cells (Figs. 4A,B). In  
15 contrast, *V. parahaemolyticus* vegetative cells substantially increased in cell length (Fig.  
16 4C) compared to *E. coli* cells, with no observable change in cell width (Fig. 4D). In  
17 response to osmotic upshifts (i.e., transitioning from H<sub>2</sub>O to NaCl), *P. mirabilis* and *V.*  
18 *parahaemolyticus* swarmer cells dramatically increased in cell length (Figs. 4A,C) (and to  
19 a lesser extent, cell width for *P. mirabilis* but not for *V. parahaemolyticus*; Figs. 4B,D)

1 compared to vegetative cells. These results suggest that changes in *P. mirabilis* and *V.*  
2 *parahaemolyticus* swarmer cell stiffness make them more responsive to osmotic changes.

3

#### 4 **Changes in PG composition of *P. mirabilis* and *V. parahaemolyticus* swarmer cells.**

5 We next studied the structural and biochemical mechanisms underlying the change in  
6 mechanical properties of swarmer cells. The connection between the structure of PG  
7 and cell mechanical properties—dating back to early antibiotic studies that revealed the  
8 penicillin binding proteins—suggested PG a starting point for these studies.

9 PG consists of the disaccharide building block  $\beta$ -(1,4)-N-acetylmuramic acid/N-  
10 acetyl-glucosamine (MurNAc-GlcNAc) in which a pentapeptide is attached to each 3'-  
11 OH group on MurNAc. Cross-linking between adjacent pentapeptides creates a mesh-  
12 like polymeric layer, and altering its structure and composition affects cell-mechanical  
13 properties (14, 15). To determine whether the PG composition of *P. mirabilis* and *V.*  
14 *parahaemolyticus* cells changes during swarming, we isolated PG sacculi from vegetative  
15 and swarmer cells and used ultra performance liquid chromatography-mass  
16 spectrometry (UPLC-MS) to quantify its chemical composition (Fig. S5). As the PG  
17 composition of *V. parahaemolyticus* has not yet been reported, we characterized its  
18 mucopeptide stem peptide using UPLC-MS/MS (Fig. S6 and Table S1). Similar to *E. coli*  
19 (22) and *P. mirabilis* (23), *V. parahaemolyticus* has a PG structure that is conserved across

1 other gram-negative bacteria, in which the peptide stem consists of L-Ala-D-Glu-*meso*-  
2 diaminopimelic acid (*meso*-DAP)-D-Ala-D-Ala (Fig. S6).

3         Compared to vegetative cells, *P. mirabilis* swarmer cells contained fewer  
4 monomers (MurNAc-GlcNAc), more dimers, and more anhydrous-containing  
5 saccharides, which are found at the terminating end of glycan polymers (Fig. 5A) (11).  
6 We detected no differences in the relative abundance of trimers between swarmer and  
7 vegetative cells of *P. mirabilis* (Fig. 5A). The increase in anhydrous-containing  
8 saccharides that we observed in *P. mirabilis* swarmer cells was correlated with a  
9 decrease in polysaccharide length (Fig. 5B). A similar increase in anhydrous-containing  
10 saccharides and decreased length of polysaccharides occurred in *V. parahaemolyticus*  
11 swarmer cells (Fig. 5A,B). We found no change in cross-linking density between  
12 vegetative and swarmer cells of either *P. mirabilis* or *V. parahaemolyticus* (Fig. 5C).

13

14 **Swarmer cells have a reduced PG thickness and display membrane defects.** Changes  
15 in the thickness of the PG layer and structure of the cell envelope may also explain the  
16 observed decrease in swarmer cell stiffness. To identify changes in PG thickness of  
17 swarmer cells, we isolated intact sacculi from *P. mirabilis* vegetative and swarmer cells  
18 and measured the thickness of dried sacculi using tapping-mode atomic force  
19 microscopy (AFM) (Fig. 6A). Differences in the nanoscopic appearance of the sacculi of  
20 different cells were not observed by AFM (Fig. S7). The thickness of isolated, dry *P.*



1 *mirabilis* swarmer cell sacculi ( $1.0 \pm 0.2$  nm) was reduced ~1.5-fold compared to  
2 vegetative cells ( $1.5 \pm 0.2$  nm) (Fig. 6A). *V. parahaemolyticus* swarmer cells ( $0.6 \pm 0.1$  nm)  
3 exhibited a similar ~1.2-fold decrease in thickness compared to vegetative cells ( $0.8 \pm 0.2$   
4 nm). Earlier AFM measurements of isolated sacculi indicated that dehydration reduced  
5 the thickness of *Escherichia coli* PG by ~2x, which we used to estimate the dimensions of  
6 hydrated PG from *P. mirabilis* (3.1 and 2.1 nm for vegetative and swarmer cells,  
7 respectively) and *V. parahaemolyticus* (1.7 and 1.4 nm, respectively) (24). A comparison  
8 of PG thickness and cell bending rigidity suggested that the relationship between these  
9 data is approximately exponential ( $R^2=0.9874$ ) (Fig. 6B).

10 A caveat with conversions between dried and hydrated values is that they are  
11 most accurate for PG that best mimics the structure and composition (e.g., crosslinking  
12 and polysaccharide composition) of the reference material: *E. coli* PG. Alterations in the  
13 polysaccharide length of PG from *P. mirabilis* and *V. parahaemolyticus* may be more  
14 elastic and stretch out during drying, thereby appearing to have a thickness that is  
15 reduced compared to *E. coli* PG. Our control measurements on isolated, dry *E. coli*  
16 sacculi yielded a thickness of 2.0 nm, which varies from the value of 3.0 nm published  
17 by Yao et al. using the same technique (24). A difference of ~30% between these *E. coli*  
18 measurements may arise for several reasons, including: variations in physical  
19 conditions that impact AFM measurements, improvement in the resolution of AFMs,  
20 and/or the precision of fitting force curves.

1           The relatively low variability in the values we measured for isolated sacculi from  
2 *P. mirabilis* and *V. parahaemolyticus* cells (~16-25%) using AFM demonstrated a consistent  
3 reduction in PG thickness for swarmer cells, suggesting that our measurements are  
4 sufficient for comparing PG from vegetative and swarming cells, and demonstrating a  
5 connection between PG and changes in cell mechanics. In contrast, the variability in  
6 AFM measurements and analysis makes us less comfortable comparing absolute values  
7 of PG thickness in our studies to those reported for bacteria in other papers.

1           To complement AFM measurements, we attempted to measure the thickness of  
2 native PG using electron cryotomography (ECT) on intact vegetative and swarmer cells  
3 (Figs. 6C,D, S8, and S9). Although we were unable to resolve the thickness of native PG  
4 by direct ECT measurements, we noticed that the sub-tomogram-averaged ECT  
5 volumes of the *P. mirabilis* cell wall (Fig. 6C) indicated the distance between the inner  
6 and outer membranes of swarmer cells was smaller than in vegetative cells (Figs. 6C,D).  
7 *P. mirabilis* vegetative cells had a characteristically smooth membrane (Fig. S8A,B) that  
8 was similar to the presentation of the membrane found along the lateral, cylindrical  
9 walls of swarmer cells (Fig. S8C,D). In contrast, the polar regions of both *P. mirabilis* and  
10 *V. parahaemolyticus* swarmer cells had an undulating outer membrane suggestive of an  
11 altered structure (Fig. S8E,F and S9D-F), and *V. parahaemolyticus* cells had significant  
12 defects in their cell-envelope, including, membrane budding, vesicle formation, and  
13 ruptured cell walls (Fig. S9D-F).

14

15 **Increased susceptibility of *P. mirabilis* and *V. parahaemolyticus* swarmers to the cell**  
16 **wall-targeting antibiotics.** Although swarming colonies of bacteria display resistance to  
17 many antibiotics (5), our experiments suggest *P. mirabilis* and *V. parahaemolyticus*  
18 swarmer cells have changes in PG structure, composition, and properties that may  
19 increase their susceptibility to cell wall-targeting antibiotics. To determine the  
20 sensitivity of *P. mirabilis* and *V. parahaemolyticus* swarmers to the cell wall-targeting

1 antibiotics cephalexin (inhibits PBP3 and 4) (25) and penicillin G (inhibits PBP3, 4, and  
2 6), we measured swarmer single-cell growth in the presence of the minimum inhibitory  
3 concentration (MIC) of antibiotics in a microfluidic device. We were unable to measure  
4 MICs using traditional protocols because the swarmer cells dedifferentiate at shorter  
5 time scales than these protocols. Instead, we chose 3 h of incubation for our  
6 measurement for three key reasons: 1) swarmer cells do not dedifferentiate over this  
7 time period; 2) a past study demonstrated that treating cells with cephalexin for 3 h was  
8 sufficient to kill ~100% of a population of *E. coli* cells (26); and 3) ~2 h of cephalexin  
9 treatment was sufficient to observe cell lysis of *E. coli* cells measured by single cell  
10 growth (27).

11 We constructed a simple microfluidic flow cell to maintain the swarming  
12 phenotype of cells during experiments and supply cells with a source of continuously  
13 replenished fresh growth media to ensure exponential cell growth and a constant  
14 concentration of antibiotics. Channel walls consisted of the biocompatible polymer,  
15 poly(dimethylsiloxane) (PDMS). Cells were in contact with the channel floor, which  
16 consisted of a layer of a 2% agarose gel. See Figure S12 for a cross-section of the device.  
17 We found that the survival of *P. mirabilis* (66%) and *V. parahaemolyticus* (64%) vegetative  
18 cells treated with 1X MIC of cephalexin was slightly higher than *E. coli* cells (55%) (Figs.  
19 7A, S10). Treating *P. mirabilis* and *V. parahaemolyticus* swarmer cells with 1X MIC of  
20 cephalexin reduced survival to 37% and 19%, respectively (Figs. 7A, S10), indicating  
21 their increased susceptibility. Rates of cell survival in the presence of penicillin G were

1 similar to the use of cephelexin (Fig. 7A). We characterized dead cells using microscopy  
2 to measure membrane blebbing, cell lysis, and changes in the refractive index of cells.

3 Cell wall-targeting antibiotics are most effective against actively growing cells  
4 (28, 29) and therefore increases in growth rate will reduce cell survival. To determine  
5 whether a growth rate phenotype explains our observations, we normalized data for  
6 cell length, and were unable to detect a change in the growth rate of swarmer cells  
7 when they were treated with these two antibiotics (Fig. S11). We measured the mean  
8 survival time of cells (the amount of time elapsed after treatment with drugs before cell  
9 death) for *P. mirabilis* and *V. parahaemolyticus* swarmer cells treated with cephelexin and  
10 penicillin G (Fig. 7B) and found that the survival time for these swarmer cells was lower  
11 than that for vegetative cells (Fig. 7B), which is consistent with alterations in the PG.

12

13

14

15

16

17

18

19

20

## 1 Discussion

2 *P. mirabilis* is commonly associated with complicated urinary tract infections and  
3 increased mortality in cases of bacteremia (30). Swarming is hypothesized to enable *P.*  
4 *mirabilis* cell movement from the ureter to the kidney; in support of this hypothesis,  
5 swarming deficient mutants have lower rates of host infection (31). We found that  
6 during swarming, *P. mirabilis* and *V. parahaemolyticus* cells become more flexible due to  
7 changes in the thickness and composition of the PG. Although we were unable to  
8 precisely measure the thickness of isolated PG, the decrease in the distance between the  
9 inner and outer membranes of swimmers may reflect a reduction in PG thickness.  
10 Several recent studies suggest how changes in the cell wall influence cell stiffness. A  
11 recent study revealed the connection between changes in the biochemical regulation of  
12 D-Ala-D-Ala and *Pseudomonas aeruginosa* cell stiffness in cells in which this biochemical  
13 machinery is altered (32). This current study and the *P. aeruginosa* paper (32)  
14 demonstrate that it is still difficult to quantitatively understand the scaling between the  
15 magnitude of the biochemical changes in cells and changes in cell stiffness. The range of  
16 techniques now available for quantitatively measuring single cell stiffness will enable  
17 the development of this relationship.

18 We found that *P. mirabilis* and *V. parahaemolyticus* swarmer cells were more  
19 susceptible to large changes in cell length than vegetative cells during osmotic shift  
20 experiments. These changes are consistent with what would be expected from a

1 reduction in PG thickness in swarming cells. We also observed that the length of  
2 polysaccharides was reduced in swarming cells, which would not obviously lead to  
3 large changes in cell elongation during osmotic shifts if the organization of PG in these  
4 cells follows what is known about the structure of PG in *E. coli* cells (33):  
5 polysaccharides reported to be arranged circumferentially around cells with the peptide  
6 cross-links oriented parallel to the long axis of cells. Instead, we expect that a decrease  
7 in polysaccharide length makes swarmer cells more prone to changes in diameter. *P.*  
8 *mirabilis* swarmer cells appear to increase in diameter during osmotic shifts (with no  
9 change occurring for vegetative cells), however the data are noisy and not accurately fit  
10 with standard models; we were unable to observe a trend with *V. parahaemolyticus*  
11 swarmer cells (Fig. 5).

12 Another recent study demonstrated the role of the outer membrane in the cell  
13 stiffness of gram-negative bacteria (34). Chemical and genetic changes in the outer  
14 membrane increased the deformation of the cell envelope to stretching, bending, and  
15 indentation forces and increased the amount of cell lysis arising during osmotic shock.  
16 It is possible that the morphological changes in swarmer cell membranes that we  
17 observed during ECT experiments indicate membrane perturbations that contribute  
18 significantly to changes in cell stiffness. Swarming in *Proteus* and *Vibrio* is well known to  
19 occur in parallel with the secretion of lipopolysaccharides (3, 4), the source of which is  
20 presumably the outer membrane of these bacteria, which may alter cell stiffness.

1           This paper demonstrates for the first time the ability of bacteria to modulate their  
2 cell stiffness (beyond L-forms). Presumably this phenotype (i.e., more flexible) conveys  
3 an adaptive advantage for cells that is supported by observations from many labs that  
4 the motility of communities of swarmer cells is enhanced when cell-cell contacts are  
5 increased. The adaptive advantage of swarming in *P. mirabilis* and *V. parahaemolyticus*  
6 however appears to be offset by a decrease in their fitness, as cells become more  
7 sensitive to osmotic changes and cell wall-targeting antibiotics, thereby creating an  
8 “Achilles heel” for targeting this phenotype in infectious diseases. This study highlights  
9 the plasticity of bacteria (1), the continuing need for methods of evaluating  
10 chemotherapies that measure efficacy against cells in a physiological state relevant to  
11 specific infections, and the reconsideration of cell wall-targeting antibiotics for treating  
12 UTIs in which *P. mirabilis* may be present.

13

14

15

16

17

18

19

20



## 1 **Materials and Methods**

2 **Bacterial strains and cell culture.** *P. mirabilis* strain HI4320, *V. parahaemolyticus* LM5674,  
3 *Escherichia coli* MG1655 (CGSC #6300), and plasmids *pflhDC* (10) and *psula*(18) were  
4 used for experiments used in this paper. *P. mirabilis* was grown in PLB nutrient medium  
5 consisting of 1% peptone (weight/volume), 0.5% yeast extract (w/v), and 1% NaCl (w/v).  
6 *V. parahaemolyticus* was grown in nutrient medium (HI medium) consisting of 2.5%  
7 heart infusion (w/v) and 2.5% NaCl (w/v). *E. coli* was grown in lysogeny broth (LB)  
8 consisting of 1% tryptone (w/v), 0.5% yeast extract (w/v), and 1% NaCl (w/v). All strains  
9 were grown at 30 °C with shaking at 200 rpm.

10

11 **Immunostaining flagella on *E. coli* cells to determine flagella surface density.** As a  
12 control to determine the influence of the surface density of bacterial flagella on  
13 measurements of bending rigidity, we imaged two *E. coli* MG1655 strains with different  
14 flagella densities using a polyclonal flagellin antibody and an immunostaining  
15 procedure for flagella visualization (35).

16

17 **Calculating vegetative and swarmer cell division times.** We prepared vegetative cells  
18 by diluting an overnight culture 1:200 in fresh medium and grew the cells at 30 °C with  
19 shaking at 200 rpm to an optical density (OD;  $\lambda=600$  nm) of 0.6. We prepared swarmer  
20 cells as described previously (35). We monitored the growth of *P. mirabilis*, *V.*

1 *parahaemolyticus*, and *E. coli* vegetative cells over 120 min at 30 °C in the microfluidic  
2 flow chamber device described in the next section. We performed a similar experiment  
3 with *P. mirabilis* and *V. parahaemolyticus* swimmers growing over 65 min at 30 °C to  
4 determine the amount of time elapsed before cells divided. We collected images of cells  
5 at 1-min intervals and determined the division time for a maximum of 10 generations  
6 (for vegetative cells) and 4 division events (for swimmer cells).

7

8 **Measuring the sensitivity of cells to osmotic shock in a microfluidic device.** We

9 prepared filamentous vegetative cells of *P. mirabilis* and *V. parahaemolyticus* by diluting  
10 an overnight culture of cells 1:200 into fresh medium. We then grew cultures at 30 °C  
11 with shaking for 1 h, added aztreonam (MP Biomedicals) to a final concentration of 10  
12 µg/mL and grew cells for an additional 70 min. Swimmer cells were prepared as  
13 described previously (35). To maximize the number of cells attached to a surface in the  
14 microfluidic device (flow chamber construction described below), we concentrated cells  
15 to an OD<sub>600</sub> of 8 in 100 µL of liquid nutrient medium.

16 We prepared the microfluidic device for experiments by flowing 10 µL of  
17 undiluted Cell-Tak (Corning) into the device and incubated it for 10 min at 25 °C. Next,  
18 we flowed 20 µL of a suspension of cells (OD<sub>600</sub>=8) through the device, then repeated  
19 with another 20 µL aliquot of cell suspension. To aid the adherence of the highly motile  
20 swimmer cells to the Cell-Tak-coated surface, we centrifuged the device for 5 min at 300

1 x g in a centrifuge (Beckman Coulter) equipped with a swinging bucket rotor.

2 For osmotic shock experiments, we filled separate 1-mL syringes (BD) with a  
3 solution of UltraPure distilled water (Invitrogen) or 1 M of a NaCl solution prepared in  
4 ddH<sub>2</sub>O and connected the syringes using a three-way valve. We mounted the  
5 microfluidic device on a TE2000-E inverted microscope and imaged cells in the chamber  
6 at 25 °C (decreasing the temperature reduced growth and cell division). Prior to osmotic  
7 shock, we flowed 200 µL of fresh liquid media (PLB for *P. mirabilis*, LB for *E. coli*, and HI  
8 for *V. parahaemolyticus*) through the device to remove cells that were not adhered to the  
9 channel surface. While imaging, we flowed a 1 M NaCl solution through the channel  
10 and observed cell plasmolysis, immediately after which we flowed ddH<sub>2</sub>O through the  
11 channel and observed cells elongating. We collected images of hundreds of single cells  
12 after exposing them to three conditions: 1) isotonic culture (PLB, LB, HI); 2) hypertonic  
13 shock (1 M NaCl); and 3) hypotonic shock (ddH<sub>2</sub>O).

14 To determine changes in cell size and width, we extracted individual cell  
15 contours from the images taken for each treatment using MATLAB 2014a (MathWorks)  
16 and used MicrobeTracker (36) to determine cell lengths ( $L$ ) and widths ( $W$ ). From these  
17 measurements we calculated  $\Delta L$  ( $L_{\text{hypotonic}} - L_{\text{hypertonic}}$ ) and  $\Delta W$  ( $W_{\text{hypotonic}} - W_{\text{hypertonic}}$ ) for  
18 vegetative and swarmer cells of *P. mirabilis* and *V. parahaemolyticus*.

19

20 **Determining the minimum inhibitory concentration (MIC) of vegetative cells of *P.***

1 *mirabilis* and *V. parahaemolyticus*. We used the micro-dilution protocol (37)  
2 to determine the MIC of cephalexin in accordance with Clinical and Laboratory  
3 Standards Institute. Briefly, we added 400 µg/mL of cephalexin (BP Biomedicals) or  
4 penicillin G (BP Biomedicals) to the first well of a 96-well microplate (Nunc) and diluted  
5 these antibiotics 2-fold across adjacent wells (wells #1-11); well 12 was a no-drug  
6 control. We determined the MIC after 16 h of growth at 30 °C with shaking by  
7 identifying the lowest concentration of cephalexin and penicillin G that inhibited cell  
8 growth by visual inspection. The MIC was determined from three replicate plates. We  
9 determined the MIC of cephalexin against *E. coli* MG1655 (1X MIC = 6.25 µg/mL, 32X  
10 MIC = 200 µg/mL), *P. mirabilis* (100 µg/mL), and *V. parahaemolyticus* (50 µg/mL). The  
11 MIC of penicillin G against *P. mirabilis* was 12.5 µg/mL.

12

13 **Antibiotic treatment of vegetative and swarmer cells and measurement of their**  
14 **growth in a microfluidic device.** We prepared vegetative and swarmer cells of *P.*  
15 *mirabilis* and *V. parahaemolyticus* as described above. Prior to use, we diluted cells 1:100  
16 in fresh medium to a cell density that enabled us to image many individual cells  
17 simultaneously in the microfluidic device described in the section above.

18 To prepare the microfluidic device for monitoring growth, we applied a 250 µm-  
19 thick layer of PDMS prepolymer to the surface of (#1.5, 35 x 50 mm) cover glass  
20 (FisherBrand) using a spincoater (Laurell Technologies) and polymerized the polymer

1 overnight at 60 °C. We subsequently removed a 6 mm x 4 mm rectangle of PDMS from  
2 the center of the cover glass using a scalpel. We applied transparent tape to both sides  
3 of this rectangular well and pipetted 100  $\mu$ L of media containing a 2% (w/v) solution  
4 UltraPure agarose (Invitrogen) into the well. We placed a (#1.5, 22 x 30 mm) cover glass  
5 (FisherBrand) on top of the liquid agarose (to flatten the agarose surface), pressed the  
6 cover glass against the transparent tape, and solidified the agarose at 25 °C. Next, we  
7 removed the #1.5 cover glass, tape, and any residual agarose from the PDMS surface.  
8 We pipetted 2  $\mu$ L of a suspension of cells on the agarose pad surface, waited until the  
9 excess liquid had evaporated or been absorbed by the agarose, carefully removed the  
10 agarose layer, inverted it, and placed it back into the well such that the cells were  
11 positioned between the agarose surface and the cover glass. We placed the PDMS flow  
12 chamber used in the construction of the osmotic shock microfluidic device on the  
13 PDMS-coated cover glass and aligned it such that the agarose pad was centered in the  
14 flow channel (Fig. S12).

15 For antibiotic treatment of cells in the microfluidic cell growth device, we filled a  
16 6-mL syringe (Norm-Ject) with cephalexin or penicillin G at a concentration  
17 corresponding to 1X MIC dissolved in nutrient medium. We supplied a constant flow of  
18 20  $\mu$ L/min to the device using a syringe pump (Harvard Apparatus) and monitored the  
19 growth of individual cells during antibiotic exposure using a TE2000-E inverted  
20 microscope. The stage and objective heater were maintained at 30 °C. Images were

1 collected every 1 min for 3 h.

2           Due to the aberrant shape of cells treated with cephalexin and penicillin G (Fig.  
3 S10), we were unable to use an automated script (e.g., MicrobeTracker) to determine cell  
4 death. Instead, we visually determined the time of death for individual cells when they  
5 exhibited three phenotypes that collectively indicate cell death: blebbing (membrane  
6 swelling), lysis (bleb rupture), and disappearance of cells in phase contrast microscopy  
7 (loss of cytoplasmic material).

8

9 **Determining cell growth rates in the presence of antibiotics.** We prepared vegetative  
10 and swarmer cells of *P. mirabilis* and *V. parahaemolyticus* as described above. We  
11 monitored individual cell growth at 30 °C in the presence of 1X MIC of cephalexin and  
12 penicillin G in our microfluidic growth device (described above) by collecting an image  
13 every 1 min for 15 min. To calculate the growth rate, we first extracted individual cell  
14 contours at each time point using MicrobeTracker and determined cell length. To take  
15 into account the differences in starting length between *P. mirabilis* and *V.*  
16 *parahaemolyticus* cells, we normalized the change in length to the initial cell length  
17 ( $\Delta L/L_0$ ) at each time point. To determine the growth rate for individual cells, we fit their  
18 relative length over time to an exponential function using GraphPad Prism 6.0  
19 (GraphPad Software).

20

1 **Measuring cell envelope architecture and peptidoglycan thickness using electron**

2 **cryotomography.** We prepared vegetative and swarmer cells of *P. mirabilis* and *V.*

3 *parahaemolyticus* and concentrated them to an  $OD_{600}=10$ . For ECT, we mixed vegetative

4 and swarmer cells with bovine serum albumin-treated 10-nm diameter gold particles

5 that served as fiducial markers, applied them to electron microscopy grids, and plunge-

6 froze them in a mixture of liquid ethane and propane, as described previously (38).

7 Grids were stored in liquid nitrogen until imaging.

8 We acquired images on a 300 KeV Polara transmission electron microscope (FEI)

9 with a GIF energy filter (Gatan) and a K2 Summit direct detector (Gatan). We collected

10 tilt series from  $-60^\circ$  to  $+60^\circ$  with  $1^\circ$  increments using UCSFtomo software with a defocus

11 of  $-10 \mu\text{m}$  and a total dosage of  $190 \text{ e}/\text{\AA}^2$  (39) at a magnification of  $27500\times$ . Tomograms

12 were calculated using IMOD software (40).

13 For sub-tomogram averaging, smooth and flat membrane regions were chosen

14 by eye; a volume of  $40 \times 70 \times 12$  voxels ( $62 \text{ nm} \times 109 \text{ nm} \times 19 \text{ nm}$ ) was centered using the

15 outer membrane and extracted. We aligned 38 extracted “membrane fragments” from

16 four *P. mirabilis* vegetative cells and 42 fragments from nine *P. mirabilis* swarmer cells

17 and averaged them in PEET (41). The densities from two averaged membranes were

18 scaled to match each other using IMOD (40), cross-averaged density profiles were

19 measured using ImageJ 1.50c (42), and figures were generated in OriginPro (OriginLab).

20

1 **Determining the thickness of *P. mirabilis* and *V. parahaemolyticus* sacculi (isolated**  
2 **peptidoglycan) by atomic force microscopy (AFM) in ambient conditions.** We isolated  
3 *P. mirabilis* and *V. parahaemolyticus* swarmer cells, concentrated them at 800 x g for 10  
4 min, removed the supernatant, flash froze the cell pellet in liquid nitrogen, and stored it  
5 at -80 °C. Swarmer cell pellets were thawed at 4 °C and pooled for isolation of sacculi  
6 (intact peptidoglycan). To increase the efficiency of cell lysis prior to isolating sacculi,  
7 we resuspended vegetative and swarmer cell pellets in 3 mL of cold 1X phosphate-  
8 buffered saline (ThermoScientific), then lysed cells with a tip sonicator (Qsonica) for ~10  
9 s at a power setting of 75%. We confirmed cell lysis using optical microscopy. We  
10 isolated sonicated cells, resuspended sacculi in 20 (*V. parahaemolyticus* swarmers) or 200  
11 µL of ddH<sub>2</sub>O (all other cells), immediately flash froze the sacculi in liquid nitrogen, and  
12 stored them at -80 °C.

13 To prepare sacculi for AFM, we transferred 10 µL of sacculi thawed at 4 °C to a  
14 new microcentrifuge tube placed in a bath sonicator (Branson) that was cooled with ice  
15 for 10 min to aid in the dispersal of sacculi without affecting sacculus architecture (43).  
16 After sonication, we pipetted 10 µL of the sacculi onto freshly cleaved mica (Ted Pella),  
17 dried the mica under nitrogen gas, washed it 3x with 1 mL of ddH<sub>2</sub>O (filtered through a  
18 0.2 µm-diameter pore filter (Corning)), dried the sacculi under nitrogen gas, and imaged  
19 immediately after preparation.

20 We performed AFM using a Catalyst AFM (Bruker) operating in tapping mode



1 in ambient conditions (air) with an aluminum reflex-coated silicon AFM probe (Ted  
2 Pella;  $k = 40$  N/m). Before imaging, AFM probes were auto-tuned using Nanoscope 8.15  
3 (Bruker). We collected all images at high resolution (512 x 512 pixels) with a scan speed  
4 of 1 Hz and analyzed images using NanoScope Analysis 1.4 (Bruker). Prior to  
5 determining sacculi thickness, we flattened (0<sup>th</sup> order) all images to remove variations in  
6 surface thickness. Thickness was determined perpendicular to the long axis; we avoided  
7 surface debris, folds in the sacculi, and trapped material in sacculi (Fig. S7).

8

9 **Determining the composition of peptidoglycan in *P. mirabilis* and *V.***

10 ***parahaemolyticus* vegetative and swarmer cells using ultra high performance liquid**  
11 **chromatography/mass spectrometry (UPLC/MS).** We prepared vegetative and swarmer  
12 cells of *P. mirabilis* and *V. parahaemolyticus* as described above. To purify peptidoglycan  
13 for UPLC/MS, we carried out a previously reported isolation technique for Gram-  
14 negative bacteria (44) with the following modifications. Briefly, after trypsin (Sigma)  
15 inactivation, we incubated the sacculi in 1 M HCl solution (Fluka) for 4 h at 37 °C to  
16 remove any O-acetylation from the peptidoglycan, which is present in *P. mirabilis* (45).  
17 Then, the sacculi were washed three times in ddH<sub>2</sub>O, resuspended in 500 mM boric acid  
18 (Sigma) [pH 9] to OD<sub>600</sub>=3, and mixed with 1/10 the volume of mutanolysin (Sigma). The  
19 sample was incubated 16 h at 37 °C with 200 rpm shaking. The next day, the samples  
20 were centrifuged for 10 min at 9500 x g, pelleting the remaining insoluble material. The

1 supernatant was removed and put into a glass vial. To reduce the isolated mucopeptide  
2 fragments, we added 50  $\mu$ L of 20  $\mu$ g/mL sodium borohydride (Sigma) in 500 mM boric  
3 acid [pH 9] and incubated the mixture for 30 min at 25 °C. We adjusted the pH of the  
4 solution to 2-3 by adding 50% phosphoric acid (Fluka), then filtered the mucopeptide  
5 solution through a Duropore polyvinylidene fluoride filter (0.22- $\mu$ m pores; Millex) into a  
6 clean vial. Vials were immediately stored at -80 °C until use within 1 week of  
7 mucopeptide isolation.

8 For UPLC/MS, we injected 7.5  $\mu$ L of purified mucopeptides on a Cortecs 2.1 x 100  
9 mm C18 column (Waters) packed with 1.6  $\mu$ M-diameter particles and equipped with a  
10 Cortecs C18 guard column (Waters). The column temperature was maintained at 52 °C  
11 using an Acquity standard flow UPLC system equipped with an inline photodiode  
12 array (Waters). For mucopeptide separation by UPLC, we used solvent A (Optima  
13 LCMS-grade water with 0.05% trifluoroacetic acid) and solvent B (30% (v/v) Optima  
14 LCMS-grade methanol in Optima LCMS-grade water with 0.05% trifluoroacetic acid)  
15 (Fisher Scientific). Mucopeptides were eluted from the column with a gradient of  
16 increasing solvent B (1 min hold at 1% B, ramp to 99% B over 59 min, hold at 99% B for  
17 5 min, then decrease to 1% B over 1.5 min, then hold at 1% B for 4.5 min) at a flow rate  
18 of 0.2 mL/min. We analyzed the eluent from the column using a Bruker MaXis Ultra-  
19 High Resolution time-of-flight 4G mass spectrometer (Bruker Daltonic) with either an  
20 MS method or a data-dependent, top 3 MS/MS method. For both methods, capillary

1 voltage was set to 4100 V, the nebulizer pressure was 2.0 bar, and the drying gas was set  
2 to 6.0 L/m at 220 °C. Muropeptides were detected at  $\lambda=205$  nm by MS.  
3 We determined the peptidoglycan composition of *E. coli*, *P. mirabilis*, and *V.*  
4 *parahaemolyticus* vegetative and swarmer cells by comparing MS/MS fragmentation  
5 patterns using DataAnalysis version 4.2 (Bruker) (Fig. S6). Muropeptides were  
6 identified according to mass values using DataAnalysis 4.2. We calculated muropeptide  
7 masses using ChemDraw 14.0 (CambridgeSoft) (Table S1). We quantified the  
8 corresponding UV ( $\lambda=205$ ) absorbing peaks (Fig. S5) identified by MS (Bruker) from  
9 which we calculated peptidoglycan cross-linking density and strand length (46) for each  
10 species. Statistical significance was determined using GraphPad Prism 6.0

## 11 12 **Fabrication of microfluidic devices for measuring cell bending and cell growth.**

13 Masters for the cell bending device and the cell growth/osmotic shock device were  
14 fabricated on separate 3" silicon wafers using SU8 photoresist that was exposed on a  
15 Heidelberg  $\mu$ PG101 mask writer (Heidelberg Instruments, Heidelberg, Germany) and  
16 developed. The bending device (Fig. S1) is a 2-layer device. The first SU8 layer consists  
17 of  $\sim 1$   $\mu$ m tall channels for capturing cells. The wafer was then coated with the second  
18 SU8 layer ( $\sim 25$   $\mu$ m tall) that formed a central flow channel. The flow chamber (Fig. S12),  
19 consists of a single channel with a length of 10 mm, a width of 5 mm, and a height of 50  
20  $\mu$ m. The volume of the flow chamber is  $\sim 10$   $\mu$ L. After developing the masters for both

1 devices, we used the masters to emboss layers of poly(dimethylsiloxane) (PDMS),  
2 punched holes for inlets and outlets, cleaned the surfaces with tape. If the device was  
3 attached to a glass coverslip it was treated with oxygen plasma and immediately sealed  
4 against a plasma-treated # 1.5 cover glass (24 x 50 mm Fisherbrand) to form a  
5 permanent seal.

6

### 7 **Measuring the bending rigidity of *P. mirabilis*, *V. paramaemolyticus*, and *E. coli* cells.**

8 We used streak velocimetry to determine the profile of fluid flow rates in the central  
9 channel of the microfluidic device driven by gravity flow. We added fluorescently  
10 labeled 0.22  $\mu\text{m}$  microspheres (Polysciences) diluted ~1:10000 in ddH<sub>2</sub>O containing  
11 0.01% Brij-35 (Sigma) to the microfluidic channel and collected videos of the fluorescent  
12 beads moving through the channel at focal planes 2  $\mu\text{m}$  apart. We analyzed the movies  
13 with custom-written code in Igor Pro 6.37 (WaveMetrics). Briefly, we applied a  
14 Gaussian blur and threshold to each frame and used the thresholded image to establish  
15 a region that was fit to a function based on a 2D Gaussian. We used the image exposure  
16 time and length of the streaks—taking into account the size of the microspheres—to  
17 calculate microsphere velocity. We mapped the velocity profile within the channel by  
18 analyzing several hundred microspheres. We binned the velocity data into a 3D matrix  
19 and fit it to a Poiseuille function, letting the velocity coefficient, height, and width float.  
20 The velocity coefficient was used as an input to the cell bending fitting function.

1           The system for gravity flow pumping (Fig. S13) consisted of two 6-mL syringes  
2 (Norm-Ject), one 60-mL syringe (BD), one 1-mL syringe (Norm-Ject), a ruler, and a VC-6  
3 channel valve controller (Warner Instruments) connected to a VC-8 mini-valve system  
4 (Warner Instruments) that drives a three-way solenoid valve (The Lee Company).  
5 Syringe #1 (6-mL) was mounted to an immobile post, positioned 40 cm above the table  
6 surface; this syringe was used to load cells. Syringe #2 (6-mL) was positioned 75-cm  
7 above the table surface, was connected to a stage that could be raised and lowered  
8 vertically, and was used to apply flow force in the device. Syringe #3 (60-mL) was  
9 mounted to an immobile post, positioned 75-cm above the surface of the table, and was  
10 used to apply an opposing flow force at the device outlet and to collect spent  
11 media/cells. We attached two-way valves, a blunt-end needle, and tubing to each  
12 syringe, including syringe #4 (1-mL). We joined the two 6-mL syringes using a Y-  
13 junction connector that led to the VC-8-mini-valve system inlet. The outlet of the valve  
14 system was connected to the microfluidic system. A ruler on an immobile post  
15 indicated the '0 position' (no pressure).

16           For cell bending experiments, we prepared filamentous vegetative cells and  
17 swarmer cells of *P. mirabilis* and *V. parahaemolyticus*; cells were normalized to an optical  
18 density (OD;  $\lambda=600$  nm) of 1. Prior to starting a measurement, syringes 1 and 2 were  
19 flushed with ddH<sub>2</sub>O and fresh medium. Syringe 2 was filled with 4 mL of medium,  
20 syringe 3 was filled with 30 mL of ddH<sub>2</sub>O, and syringe 4 was filled with 0.8 mL of

1 ddH<sub>2</sub>O. We added cells to syringe 1 and flowed them through the tubing until they  
2 reached the device outlet. To load the cells into the side channels of the device (from the  
3 central channel), we applied a suction force using the 1-mL syringe. After the side  
4 channels were loaded with cells, we adjusted the height of syringe 2 until no flow  
5 occurred in the device. Syringe 2 was then raised 7 cm from the no-flow position (a  
6 height of 0 cm). We collected images of cells in the channel when syringe 2 was at  
7 positions 0 cm and 7 cm using a Zeiss Axiovert 100 inverted microscope (Zeiss)  
8 equipped with an iXon3 CCD (Andor), a 63X Plan-APOCHROMAT oil objective (Zeiss),  
9 and Micro-Manager 1.4.16. After collecting cell-bending deflections for all loaded cells,  
10 we expelled cells from the side channels, flowed liquid through the device for 15 s, and  
11 reloaded the side channels with new cells.

12 We analyzed images to determine cell deflection under flow using custom  
13 image-analysis software written in Igor Pro 6.37. The cell-bending model  
14 (Supplementary Information) is a differential equation that lacks an analytical solution  
15 and thus requires calculation of a numerical solution. To determine the bending rigidity  
16 of cells, we wrote custom fitting code in Igor Pro 6.37 that uses a variety of input  
17 parameters, including channel dimensions, fluid velocity, bending rigidity of the cell,  
18 cell radius, and cell length. The function numerically calculates the maximum deflection  
19 based on our model. This function is integrated into a fitting algorithm to find a least-  
20 squares solution to a dataset of maximum deflections versus cell lengths with bending

1 rigidity as the fitting parameter.

2           Our model for bending a cell under flow is based on the mechanics model of a  
3 suspended rod or cantilever bending under its own weight (see DERIVATIONS in  
4 Supplementary Information). Our experimental system was similar to that of Amir et al.  
5 (47). Although laminar flow is perpendicular to the long axis of cells in this system, the  
6 lateral deformations of cells that we measured were substantially larger (in our case, as  
7 large as 10  $\mu\text{m}$ ; compared to  $< 1 \mu\text{m}$  in Amir et al. (47). For this reason, many of the  
8 assumptions of the model presented by Amir et al. are not valid for our dataset. The  
9 model we developed to extract the bending rigidity of the bacterium takes into account  
10 the shape of the laminar flow profile, the angle of the cell against the flow profile, and  
11 the arc length of the cell (longer cells tend to fold over and do not penetrate as deeply  
12 into the flow profile). Our only major assumption is that the force of the bending  
13 moment at a particular point along a cell is not applied as an integration to the end of  
14 the cell, but is rather applied exactly one-half the distance (arc length) to the end of the  
15 cell. We found that models that take into account the full integration of the bending  
16 moment are computationally time-consuming and do not provide a substantial change  
17 in the calculated cell shape (data not shown). Additional data and mathematical  
18 derivations are described in Supplementary Information.

19

20

1 **Acknowledgements.** We thank Linda McCarter for *V. parahaemolyticus* LM5674,  
2 Suckjoon Jun for the *psulA* plasmid, Cameron Scarlett and Molly Pellitteri-Hahn for  
3 mass spectrometry support, and Julie Last for technical assistance with AFM  
4 measurements. This research was supported by the Bill and Melinda Gates Foundation  
5 (grant OPP1068092), NIH grant 1DP2OD008735-01, National Science Foundation grant  
6 DMR-1121288, a Mao Wisconsin Distinguished Graduate Fellowship (to M.R.), an NSF  
7 postdoctoral fellowship (#1202622 to P.M.O), and the Howard Hughes Medical  
8 Institute.

9  
10  
11  
12  
13  
14  
15  
16  
17  
18  
19  
20



1

## 2 References

- 3 1. Justice SS, Hunstad DA, Cegelski L, & Hultgren SJ (2008) Morphological  
4 plasticity as a bacterial survival strategy. *Nat Rev Microbiol* 6(2):162-168.
- 5 2. Rajendram M, *et al.* (2015) Anionic phospholipids stabilize RecA filament  
6 bundles in *Escherichia coli*. *Mol Cell* 60(3):374-384.
- 7 3. Copeland MF & Weibel DB (2009) Bacterial Swarming: A Model System for  
8 Studying Dynamic Self-assembly. *Soft Matter* 5(6):1174-1187.
- 9 4. Kearns DB (2010) A field guide to bacterial swarming motility. *Nat Rev Microbiol*  
10 8(9):634-644.
- 11 5. Butler MT, Wang Q, & Harshey RM (2010) Cell density and mobility protect  
12 swarming bacteria against antibiotics. *Proc Natl Acad Sci U S A* 107(8):3776-3781.
- 13 6. Kim W, Killam T, Sood V, & Surette MG (2003) Swarm-cell differentiation in  
14 *Salmonella enterica* serovar typhimurium results in elevated resistance to  
15 multiple antibiotics. *J Bacteriol* 185(10):3111-3117.
- 16 7. Overhage J, Bains M, Brazas MD, & Hancock RE (2008) Swarming of  
17 *Pseudomonas aeruginosa* is a complex adaptation leading to increased  
18 production of virulence factors and antibiotic resistance. *J Bacteriol* 190(8):2671-  
19 2679.
- 20 8. Lai S, Tremblay J, & Deziel E (2009) Swarming motility: a multicellular behaviour  
21 conferring antimicrobial resistance. *Environ Microbiol* 11(1):126-136.
- 22 9. Hay NA, Tipper DJ, Gygi D, & Hughes C (1999) A novel membrane protein  
23 influencing cell shape and multicellular swarming of *Proteus mirabilis*. *J Bacteriol*  
24 181(7):2008-2016.
- 25 10. Tuson HH, Copeland MF, Carey S, Sacotte R, & Weibel DB (2013) Flagellum  
26 density regulates *Proteus mirabilis* swarmer cell motility in viscous  
27 environments. *J Bacteriol* 195(2):368-377.
- 28 11. Vollmer W & Seligman SJ (2010) Architecture of peptidoglycan: more data and  
29 more models. *Trends Microbiol* 18(2):59-66.
- 30 12. Wang S, Arellano-Santoyo H, Combs PA, & Shaevitz JW (2010) Actin-like  
31 cytoskeleton filaments contribute to cell mechanics in bacteria. *Proc Natl Acad Sci*  
32 *U S A* 107(20):9182-9185.
- 33 13. Tuson HH, *et al.* (2012) Measuring the stiffness of bacterial cells from growth  
34 rates in hydrogels of tunable elasticity. *Mol Microbiol* 84(5):874-891.
- 35 14. Wheeler R, *et al.* (2015) Bacterial Cell Enlargement Requires Control of Cell Wall  
36 Stiffness Mediated by Peptidoglycan Hydrolases. *Mbio* 6(4):e00660.

- 1 15. Loskill P, *et al.* (2014) Reduction of the peptidoglycan crosslinking causes a  
2 decrease in stiffness of the Staphylococcus aureus cell envelope. *Biophys J*  
3 107(5):1082-1089.
- 4 16. Auer GK, *et al.* (2016) Mechanical Genomics Identifies Diverse Modulators of  
5 Bacterial Cell Stiffness. *Cell Syst* 2(6):402-411.
- 6 17. Auer GK & Weibel DB (2017) Bacterial Cell Mechanics. *Biochemistry-U*s  
7 56(29):3710-3724.
- 8 18. Amir A, Babaeipour F, McIntosh DB, Nelson DR, & Jun S (2014) Bending forces  
9 plastically deform growing bacterial cell walls. *Proc Natl Acad Sci U S A*  
10 111(16):5778-5783.
- 11 19. Gan L, Chen S, & Jensen GJ (2008) Molecular organization of Gram-negative  
12 peptidoglycan. *Proc Natl Acad Sci U S A* 105(48):18953-18957.
- 13 20. Patrick JE & Kearns DB (2012) Swarming motility and the control of master  
14 regulators of flagellar biosynthesis. *Mol Microbiol* 83(1):14-23.
- 15 21. McLaggan D, Naprstek J, Buurman ET, & Epstein W (1994) Interdependence of  
16 K<sup>+</sup> and glutamate accumulation during osmotic adaptation of Escherichia coli. *J*  
17 *Biol Chem* 269(3):1911-1917.
- 18 22. Desmarais SM, *et al.* (2015) High-throughput, highly sensitive analyses of  
19 bacterial morphogenesis using ultra performance liquid chromatography. *J Biol*  
20 *Chem* 290(52):31090-31100.
- 21 23. Strating H, Vandenende C, & Clarke AJ (2012) Changes in peptidoglycan  
22 structure and metabolism during differentiation of Proteus mirabilis into  
23 swarmer cells. *Can J Microbiol* 58(10):1183-1194.
- 24 24. Yao X, Jericho M, Pink D, & Beveridge T (1999) Thickness and elasticity of gram-  
25 negative murein sacculi measured by atomic force microscopy. *J Bacteriol*  
26 181(22):6865-6875.
- 27 25. Eberhardt C, Kuerschner L, & Weiss DS (2003) Probing the catalytic activity of a  
28 cell division-specific transpeptidase in vivo with beta-lactams. *J Bacteriol*  
29 185(13):3726-3734.
- 30 26. Chung HS, *et al.* (2009) Rapid beta-lactam-induced lysis requires successful  
31 assembly of the cell division machinery. *Proc Natl Acad Sci U S A* 106(51):21872-  
32 21877.
- 33 27. Yao Z, Kahne D, & Kishony R (2012) Distinct single-cell morphological dynamics  
34 under beta-lactam antibiotics. *Mol Cell* 48(5):705-712.
- 35 28. Tuomanen E, Cozens R, Tosch W, Zak O, & Tomasz A (1986) The Rate of Killing  
36 of Escherichia-Coli by Beta-Lactam Antibiotics Is Strictly Proportional to the Rate  
37 of Bacterial-Growth. *J Gen Microbiol* 132:1297-1304.
- 38 29. Spoering AL & Lewis K (2001) Biofilms and planktonic cells of Pseudomonas  
39 aeruginosa have similar resistance to killing by antimicrobials. *J Bacteriol*  
40 183(23):6746-6751.

- 1 30. Chen CY, *et al.* (2012) *Proteus mirabilis* urinary tract infection and bacteremia:  
2 risk factors, clinical presentation, and outcomes. *J Microbiol Immunol Infect*  
3 45(3):228-236.
- 4 31. Burall LS, *et al.* (2004) *Proteus mirabilis* genes that contribute to pathogenesis of  
5 urinary tract infection: Identification of 25 signature-tagged mutants attenuated  
6 at least 100-fold. *Infect Immun* 72(5):2922-2938.
- 7 32. Trivedi RR, *et al.* (2018) Mechanical genomic studies reveal the role of D-alanine  
8 metabolism in *Pseudomonas aeruginosa* cell stiffness. *mBio* 9:e01340-18.
- 9 33. Dobro MJ, *et al.* (2017) Uncharacterized bacterial structures revealed by electron  
10 cryotomography. *J Bacteriol* 199:e00100-17.
- 11 34. Rojas ER, *et al.* (2018) The outer membrane is an essential load-bearing element in  
12 Gram-negative bacteria. *Nature* 559: 617–621
- 13 35. Tuson HH, Copeland MF, Carey S, Sacotte R, & Weibel DB (2013) Flagellum  
14 Density Regulates *Proteus mirabilis* Swarmer Cell Motility in Viscous  
15 Environments. *Journal of Bacteriology* 195(2):368-377.
- 16 36. Sliusarenko O, Heinritz J, Emonet T, & Jacobs-Wagner C (2011) High-  
17 throughput, subpixel precision analysis of bacterial morphogenesis and  
18 intracellular spatio-temporal dynamics. *Mol Microbiol* 80(3):612-627.
- 19 37. CLSI (2000) *Methods for Dilution Antimicrobial Susceptibility Tests for Bacteria*  
20 *That Grow Aerobically; Approved Standard (Clinical and Laboratory Standards*  
21 *Institute, Wayne, PA) Fifth Ed.*
- 22 38. Tivol WF, Briegel A, & Jensen GJ (2008) An improved cryogen for plunge  
23 freezing. *Microsc Microanal* 14(5):375-379.
- 24 39. Zheng SQ, *et al.* (2007) UCSF tomography: an integrated software suite for real-  
25 time electron microscopic tomographic data collection, alignment, and  
26 reconstruction. *J Struct Biol* 157(1):138-147.
- 27 40. Kremer JR, Mastrorade DN, & McIntosh JR (1996) Computer visualization of  
28 three-dimensional image data using IMOD. *J Struct Biol* 116(1):71-76.
- 29 41. Nicastro D, *et al.* (2006) The molecular architecture of axonemes revealed by  
30 cryoelectron tomography. *Science* 313(5789):944-948.
- 31 42. Collins TJ (2007) ImageJ for microscopy. *Biotechniques* 43(1 Suppl):25-30.
- 32 43. Turner RD, Hurd AF, Cadby A, Hobbs JK, & Foster SJ (2013) Cell wall elongation  
33 mode in Gram-negative bacteria is determined by peptidoglycan architecture.  
34 *Nat Commun* 4.
- 35 44. Kuhner D, Stahl M, Demircioglu DD, & Bertsche U (2014) From cells to  
36 muropeptide structures in 24 h: peptidoglycan mapping by UPLC-MS. *Sci Rep*  
37 4:7494.
- 38 45. Strating H, Vandenende C, & Clarke AJ (2012) Changes in peptidoglycan  
39 structure and metabolism during differentiation of *Proteus mirabilis* into  
40 swarmer cells. *Can J Microbiol* 58(10):1183-1194.

- 1 46. Glauner B (1988) Separation and Quantification of Muropeptides with High-  
2 Performance Liquid-Chromatography. *Anal Biochem* 172(2):451-464.
- 3 47. Amir A, Babaeipour F, McIntosh DB, Nelson DR, & Jun S (2014) Bending forces  
4 plastically deform growing bacterial cell walls. *Proc Natl Acad Sci U S A*  
5 111(16):5778-5783.  
6  
7  
8  
9

1 **FIGURES**

2 **Fig. 1.** Images demonstrating the flexibility of *P. mirabilis* and *V. parahaemolyticus*

3 swarmer cells. (A) Time-series of *P. mirabilis* swarmer cells in a colony actively moving

4 across the surface of a 1.5% agarose gel. A representative cell, false colored green, has a

5 generally straight shape at  $t=0$  s and is bent in half at  $t=0.98$  s. Most of the cells in this

6 frame are bending during this imaging sequence. (B) A time-series of *V. parahaemolyticus*

7 swarmer cells in a colony actively moving across the surface of a 1.4% agarose gel. A

8 representative cell (false colored purple) has a generally straight shape at  $t=0$  s and is

9 bent in half at  $t=4.02$  s.

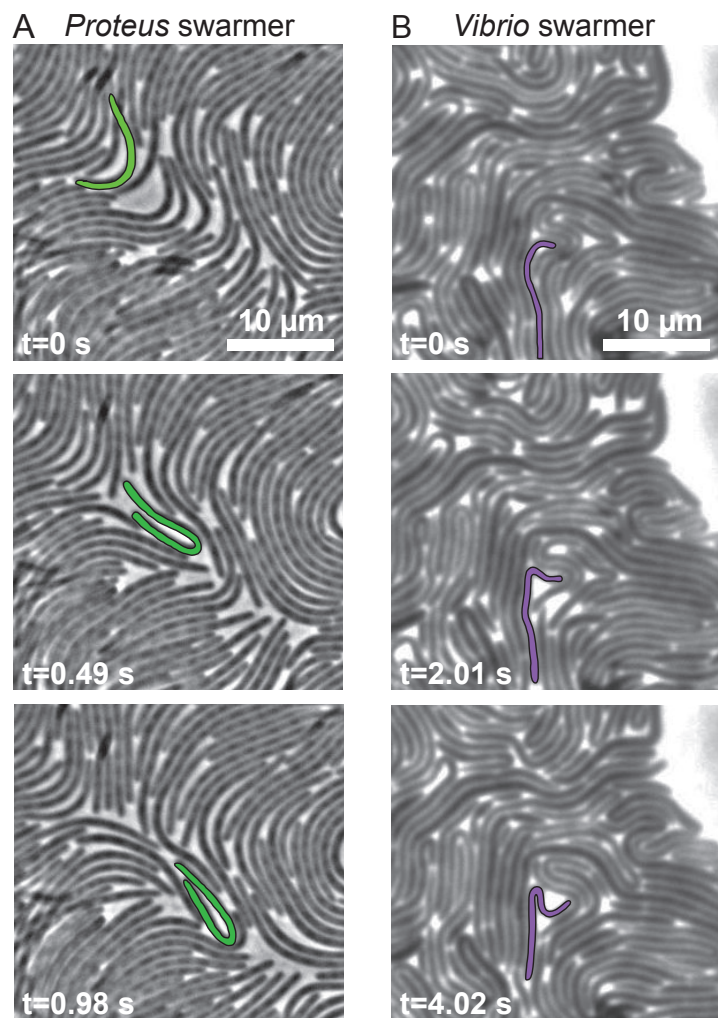

1

2 Fig. 1

3

4

5

6

7

8

9

1 **Fig. 2.** Using a reloadable microfluidic-based assay to determine bacterial cell stiffness.  
2 (A) Schematic of the microfluidic channel used to apply a user-defined shear force to  
3 bend filamentous or swarmer cells. Single-sided green arrows depict the flow of fluid  
4 through the central channel; the parabolic flow profile of the fluid is shown. Double-  
5 sided green arrows indicate the vacuum chamber used to load cells into side channels  
6 and to empty the device. (B) Cartoon of a flexible bacterium (left) and a stiff bacterium  
7 (right) under flow force ( $V_{\text{flow}}$ ).  $x_{\text{max}}$  indicates the deflection of cells in the flow;  $2r$  = cell  
8 diameter;  $L$  = cell length in contact with the flow force. (C) Representative images of  
9 filamentous cells of *P. mirabilis* in no flow (left) and flow (right) conditions (top) and *P.*  
10 *mirabilis* swarmers (bottom). Purple dashed lines indicate the position of a cell tip under  
11 no flow conditions and black dashed lines illustrate the position after flow is applied  
12 using a gravity-fed mechanism. The arrow indicates the direction of fluid flow in the  
13 channel.



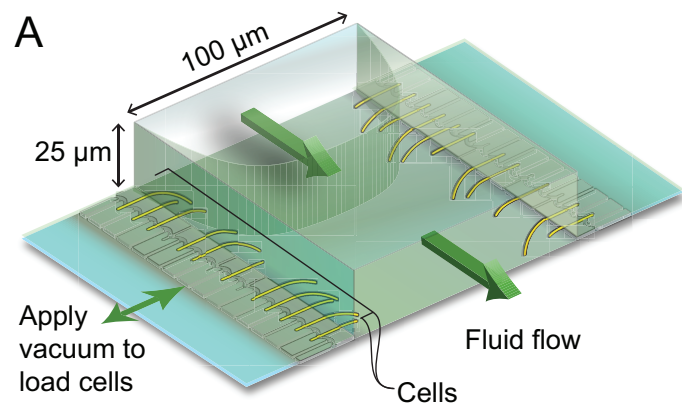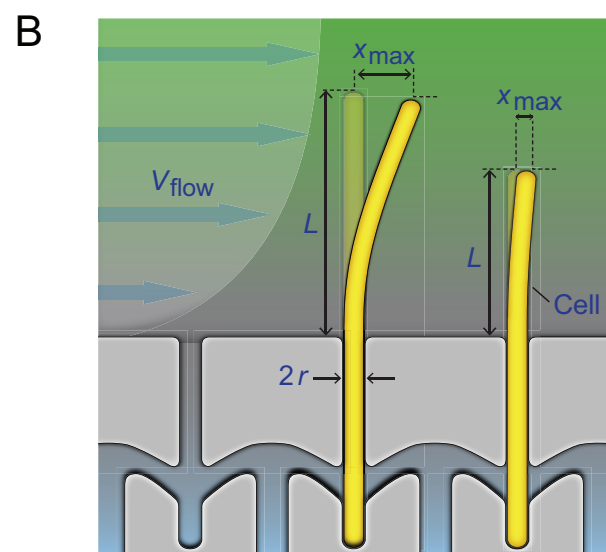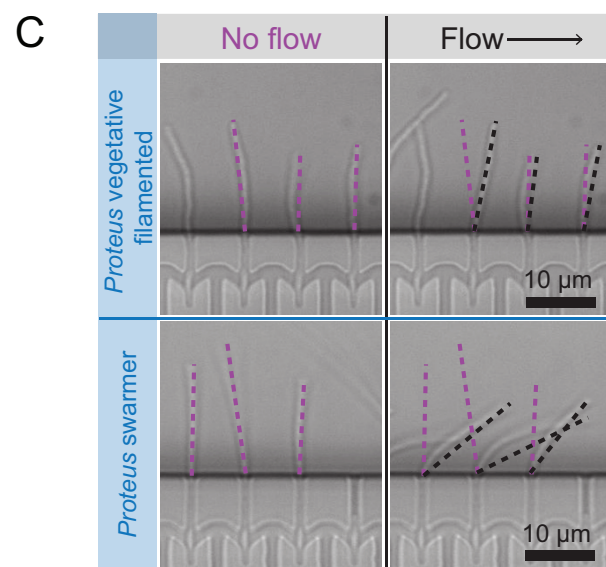

1

2 **Fig. 2**



1 **Fig. 3.** *P. mirabilis* and *V. parahaemolyticus* swarmer cells have a lower bending rigidity  
2 than vegetative cells. We measured the bending rigidity of *P. mirabilis* and *V.*  
3 *parahaemolyticus* swarmer cells and filamentous vegetative cells in a microfluidic flow  
4 assay and included measurements of vegetative *E. coli* cells. *P. mirabilis* swarmers  
5 exhibited 15-fold lower bending rigidity than vegetative cells; *V. parahaemolyticus*  
6 swarmers were 3-fold less rigid than vegetative cells. Overexpression of FlhDC (from  
7 the plasmid-encoded *pflhDC*) had little effect on the stiffness of *P. mirabilis* vegetative  
8 and swarmer cells. Error bars represent the 95% confidence interval of a fit to data.  $n >$   
9 100 cells, from at least 3 independent experiments. The plot has a linear y-axis scale.

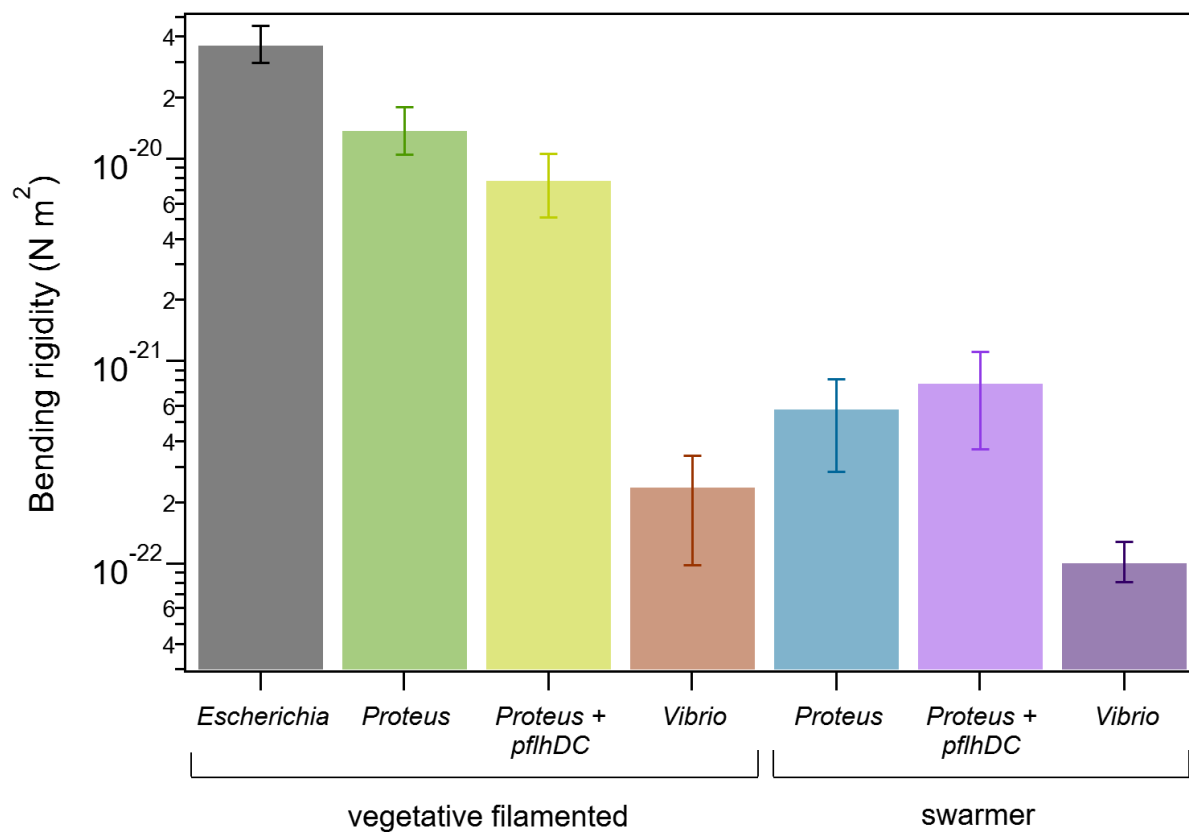

1

2 **Fig. 3**

3

4

5

6

7

8

9

10

1 **Fig. 4.** Swarmer cells increase in cell extension during osmotic shock. We calculated  $\Delta L$   
2 as (cell length in water – cell length in 1 M NaCl) and performed a similar calculation  
3 for  $\Delta W$ , substituting cell width. Cell length indicates length prior to osmotic shock. We  
4 filamented all vegetative cells using aztreonam to grow them to lengths that were  
5 comparable with *P. mirabilis* and *V. parahaemolyticus* swarmers. Lines indicate linear fits  
6 to single-cell measurements (circles) of  $n > 100$  cells from at least 3 independent  
7 experiments. (A) *P. mirabilis* swarmer cells have an increase in extension ( $\Delta L$ ) under  
8 osmotic shock compared to *E. coli* and *P. mirabilis* vegetative cells. (B) *V. parahaemolyticus*  
9 vegetative and swarmer cells have an increase in extension ( $\Delta L$ ) under osmotic shock  
10 compared to *E. coli*. (C) *P. mirabilis* swarmer cells have an increase in  $\Delta W$  compared to *E.*  
11 *coli*; *P. mirabilis* vegetative cells display a slight decrease in width and increased cell  
12 length. (D) There was no observable change in  $\Delta W$  of *V. parahaemolyticus* swarmer and  
13 vegetative cells.

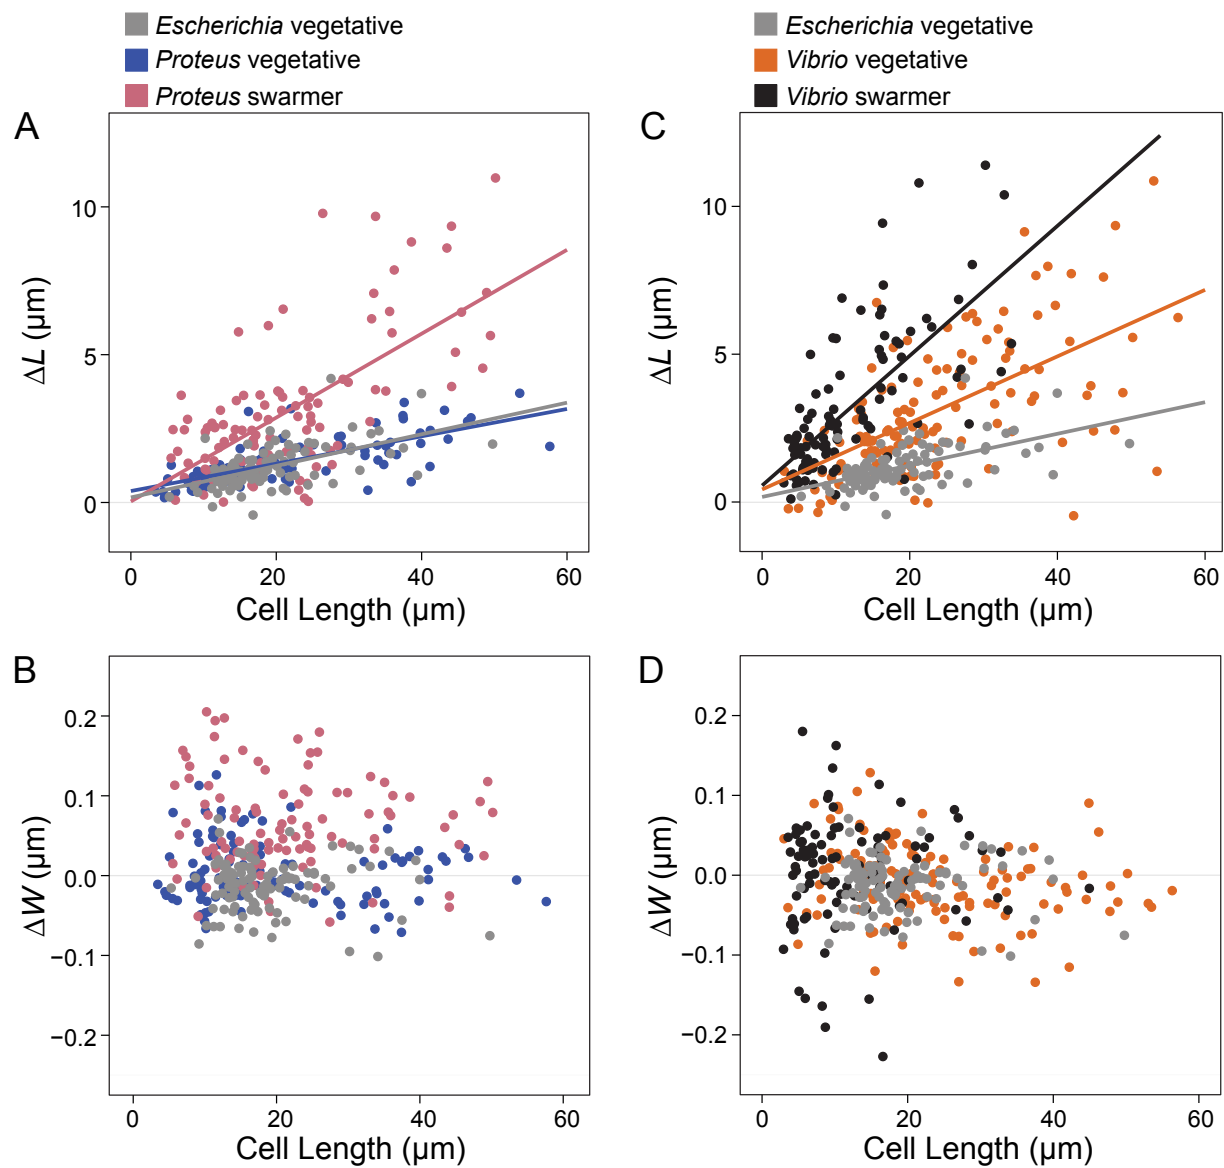

1

2 **Fig. 4**

3

4

5

6

7

1 **Fig. 5.** Alterations in the PG muropeptide composition of *P. mirabilis* and *V.*  
2 *parahaemolyticus* swarmer cells. (A) UPLC-MS data reveal that the muropeptide  
3 composition of *P. mirabilis* and *V. parahaemolyticus* vegetative and swarmer cells differs  
4 slightly in the abundance of monomer, dimer, and anhydrous-terminated saccharides.  
5 (B) We observed a relative increase in the amount of anhydrous-containing saccharides  
6 in swarmers consistent with a decrease in polysaccharide strand length. (C) There was  
7 no change in PG cross-linking of *P. mirabilis* and *V. parahaemolyticus* vegetative and  
8 swarmer cells, although *V. parahaemolyticus* does display a lower level of cross-linking. *n*  
9 = 3 biological replicates. Error bars represent the standard deviation of the mean.  
10 For (A-C), significance was determined via two-way analysis of variance: \* $P \leq 0.05$ , \*\* $P \leq$   
11  $0.01$ , \*\*\* $P \leq 0.001$ , \*\*\*\* $P \leq 0.0001$ , ns = not significant ( $P > 0.05$ ).

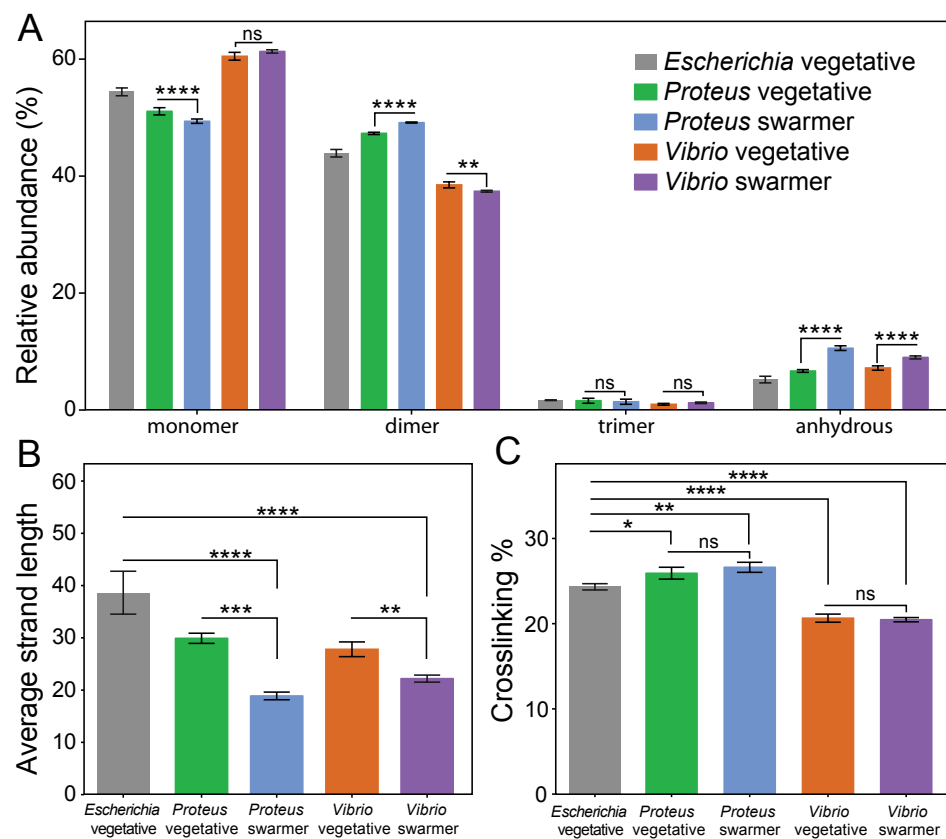

1

2 **Fig. 5**

3

4

5

6

7

8

9

10

11

1 **Fig. 6.** AFM reveals the PG layer of *P. mirabilis* and *V. parahaemolyticus* swarmer cells is  
2 thinner than in vegetative cells and ECT demonstrates a reduced membrane-to-  
3 membrane distance. (A) Sacculi were isolated from cells, dried, and imaged by AFM.  
4 The thickness of swarmer cell PG was reduced compared to vegetative cells. We  
5 analyzed >65 vegetative cells of *E. coli*, *P. mirabilis*, and *V. parahaemolyticus*, >65 *P.*  
6 *mirabilis* swarmer cells, and 7 *V. parahaemolyticus* swarmer cells. Error bars represent the  
7 standard deviation of the mean. (B) Bending rigidity and cell wall thickness display an  
8 approximately exponential relationship ( $R^2=0.9874$ ). (C) Sub-tomogram-averaged ECT  
9 volume images of the *P. mirabilis* vegetative (left) and swarmer (right) cell wall. Two  
10 central slices of sub-tomogram average volume images with normalized image densities  
11 are shown. Yellow dashed line indicates the orientation used for gray-value  
12 measurements. ES, extracellular space; OM, outer membrane; PG, peptidoglycan; IM,  
13 inner membrane; CP, cytoplasm. (D) The density profile of sub-tomogram-averaged  
14 ECT volume images reveals a reduced membrane-to-membrane distance in swarmer  
15 cells. The vertical axis is the normalized gray value with the darkest value equal to 0  
16 and the lightest value equal to 1. The red dashed line denotes the average gray value of  
17 the extracellular space and serves as a reference for the background; the blue shaded  
18 area indicates the thickness of the putative PG layer.

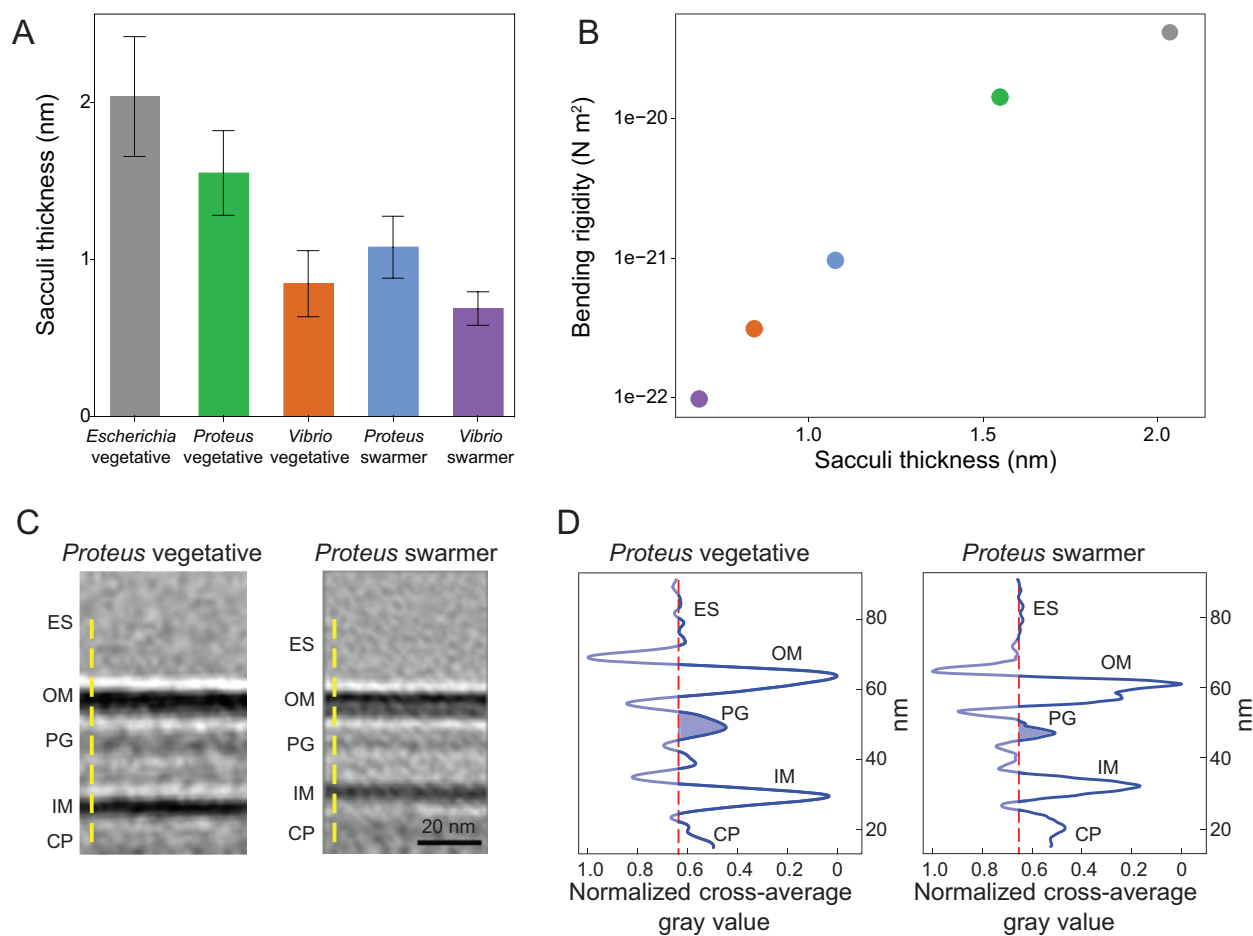



1 **Fig. 7.** Swarmer cells are more susceptible to antibiotics that target the cell wall than  
2 vegetative cells. (A) Survival of cells treated with 1X MIC of cephalixin after 3 h of  
3 incubation. We define percent survival as  $(\text{cell count}_{\text{no lysis}} / \text{cell count}_{\text{total}}) \times 100$ . *P.*  
4 *mirabilis* and *V. parahaemolyticus* swarmer cells exhibit decreased levels (~30%) of  
5 survival compared to vegetative cells;  $n \geq 90$  cells from at least two independent  
6 experiments. A similar decrease occurred when *P. mirabilis* was treated with penicillin  
7 G;  $n \geq 77$  cells from at least two independent experiments). Error bars represent the  
8 standard deviation of the mean. (B) After exposure to cephalixin or penicillin G, the  
9 survival time of *P. mirabilis* and *V. parahaemolyticus* swarmers was 2~3 fold lower than  
10 for vegetative cells. Survival time was determined for  $\geq 49$  cells that lysed from at least 2  
11 independent experiments. Significance in *A-B* was determined two-tailed t-test: \* $P \leq$   
12 0.05, \*\* $P \leq 0.01$ , \*\*\*\* $P \leq 0.0001$ .

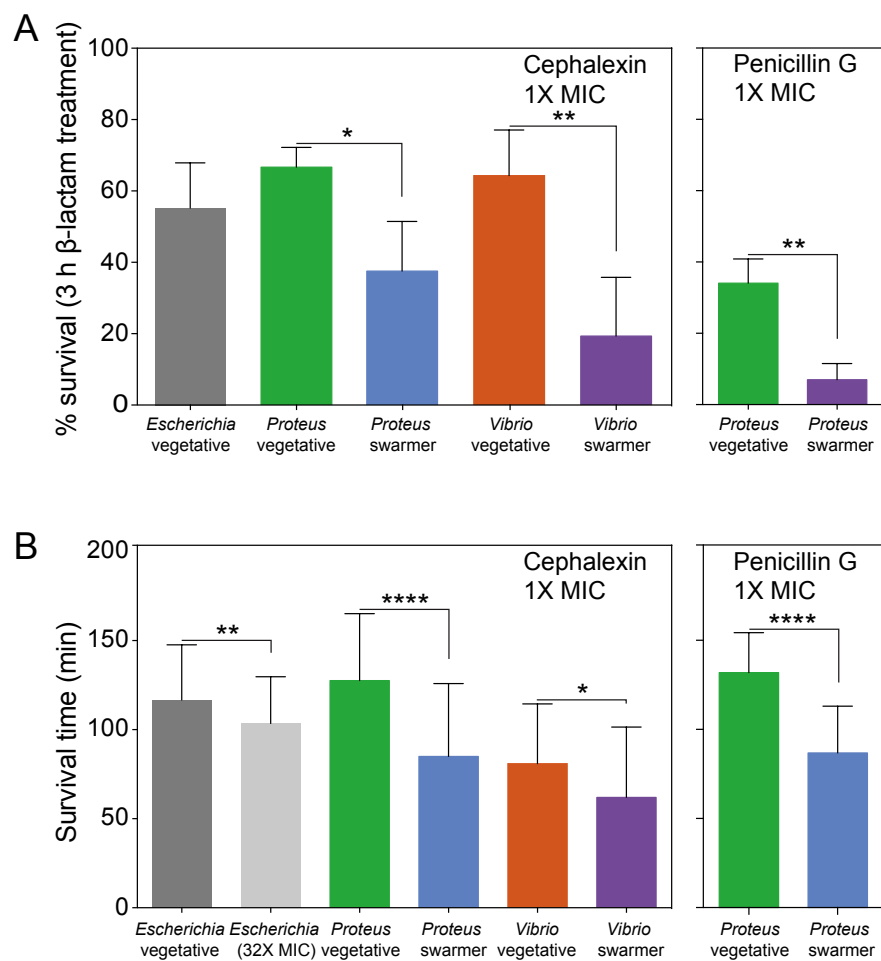

1

2 **Fig. 7**

3

4

5

6

7

8

9
